# Supplementary material for: Nonlinear molecular dynamics of quercetin in Gynocardia odorata and Diospyros malabarica fruits: Its mechanistic role in hepatoprotection
Source: PubMed Central journal article supplement (PMC8936497; doi:10.1371/journal.pone.0263917), 2022-03-21
Supplement: pone.0263917.s002.pdf [file pone.0263917.s002.pdf]

## Electronic supplementary file 2

# Nonlinear Molecular Dynamics of Quercetin in *Gynocardia odorata* and *Diospyros malabarica* fruits: Its mechanistic role in hepatoprotection

Arabinda Ghosh<sup>1†</sup>, Pranjal Sarmah<sup>2†</sup>, Harun Patel<sup>3</sup>, Nobendu Mukerjee<sup>4</sup>, Rajbardhan Mishra<sup>5</sup>, Saad

Alkahtani<sup>6\*\*</sup>, Rajender S.Varma<sup>7</sup>, Debabrat Baishya<sup>2\*</sup>

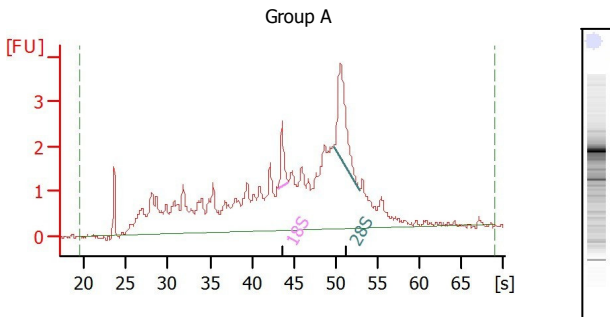

### Overall Results for sample 1 : **G A**

RNA Area: 71.4  
 RNA Concentration: 248 ng/ $\mu$ l  
 rRNA Ratio [28s / 18s]: 3.3  
 RNA Integrity Number (RIN): 4.2 (B.02.08)  
 Result Flagging Color:   
 Result Flagging Label: RIN: 4.20

### Fragment table for sample 1 : **G A**

| Name | Start Time [s] | End Time [s] | Area | % of total Area |
|------|----------------|--------------|------|-----------------|
| 18S  | 43.10          | 44.35        | 1.5  | 2.1             |
| 28S  | 49.75          | 52.75        | 4.8  | 6.7             |

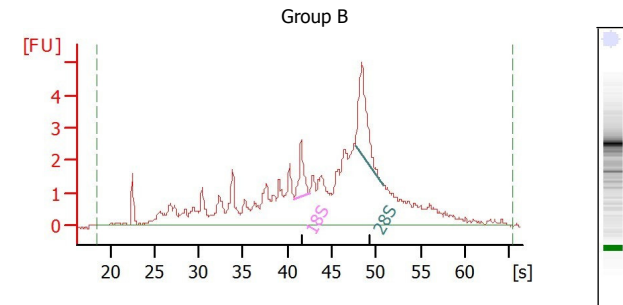

### Overall Results for sample 2 : **G B**

RNA Area: 83.5  
 RNA Concentration: 291 ng/ $\mu$ l  
 rRNA Ratio [28s / 18s]: 2.5  
 RNA Integrity Number (RIN): 4.5 (B.02.08)  
 Result Flagging Color:   
 Result Flagging Label: RIN: 4.50

### Fragment table for sample 2 : **G B**

| Name | Start Time [s] | End Time [s] | Area | % of total Area |
|------|----------------|--------------|------|-----------------|
| 18S  | 40.78          | 42.44        | 2.4  | 2.9             |
| 28S  | 47.66          | 50.84        | 6.2  | 7.4             |

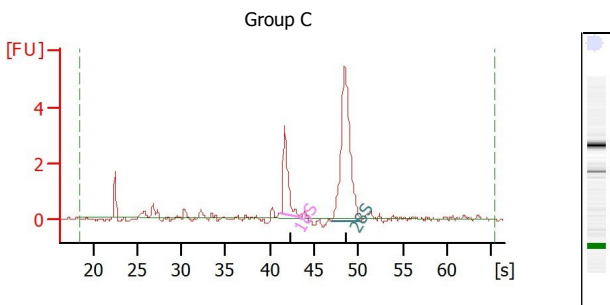

### Overall Results for sample 3 : **G C**

RNA Area: 22.4  
 RNA Concentration: 78 ng/ $\mu$ l  
 rRNA Ratio [28s / 18s]: 3.0  
 RNA Integrity Number (RIN): 8 (B.02.08)  
 Result Flagging Color:   
 Result Flagging Label: RIN:8

### Fragment table for sample 3 : **G III**

| Name | Start Time [s] | End Time [s] | Area | % of total Area |
|------|----------------|--------------|------|-----------------|
| 18S  | 41.25          | 43.53        | 4.6  | 20.3            |
| 28S  | 47.09          | 50.27        | 13.5 | 60.4            |

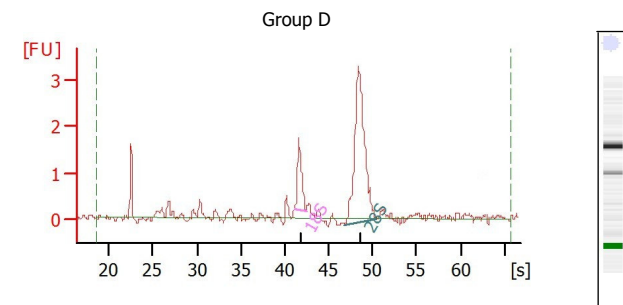

### Overall Results for sample 4 : **G D**

RNA Area: 16.6  
 RNA Concentration: 58 ng/ $\mu$ l  
 rRNA Ratio [28s / 18s]: 4.4  
 RNA Integrity Number (RIN): 7.4 (B.02.08)  
 Result Flagging Color:   
 Result Flagging Label: RIN: 7.40

### Fragment table for sample 4 : **G IV**

| Name | Start Time [s] | End Time [s] | Area | % of total Area |
|------|----------------|--------------|------|-----------------|
| 18S  | 41.09          | 42.43        | 2.0  | 12.3            |
| 28S  | 46.76          | 50.29        | 8.9  | 53.6            |

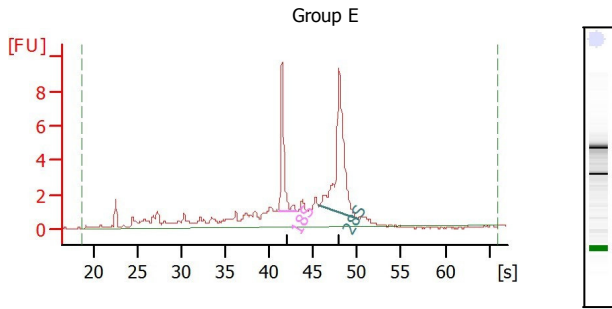

**Overall Results for sample 5 :** GE

RNA Area: 73.5  
 RNA Concentration: 256 ng/μl  
 rRNA Ratio [28s / 18s]: 2.2  
 RNA Integrity Number (RIN): 7.5 (B.02.08)  
 Result Flagging Color:   
 Result Flagging Label: RIN: 7.50

**Fragment table for sample 5 :** GV

| Name | Start Time [s] | End Time [s] | Area | % of total Area |
|------|----------------|--------------|------|-----------------|
| 18S  | 41.07          | 43.23        | 8.2  | 11.2            |
| 28S  | 45.67          | 50.07        | 17.8 | 24.2            |

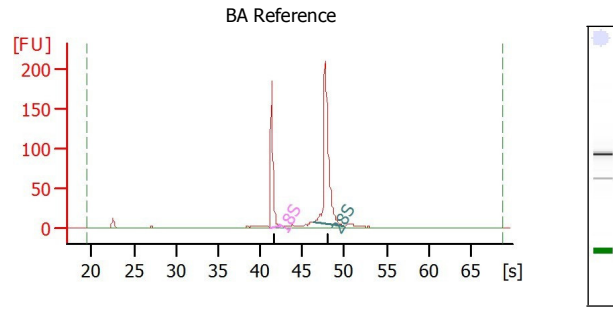

**Overall Results for sample 6 :** BA Reference

RNA Area: 533.0  
 RNA Concentration: 489 ng/μl  
 rRNA Ratio [28s / 18s]: 1.9  
 RNA Integrity Number (RIN): 10 (B.02.08)  
 Result Flagging Color:   
 Result Flagging Label: RIN:10

**Fragment table for sample 6 :** BA Reference

| Name | Start Time [s] | End Time [s] | Area  | % of total Area |
|------|----------------|--------------|-------|-----------------|
| 18S  | 41.06          | 42.31        | 140.5 | 26.4            |
| 28S  | 46.35          | 49.89        | 269.8 | 50.6            |

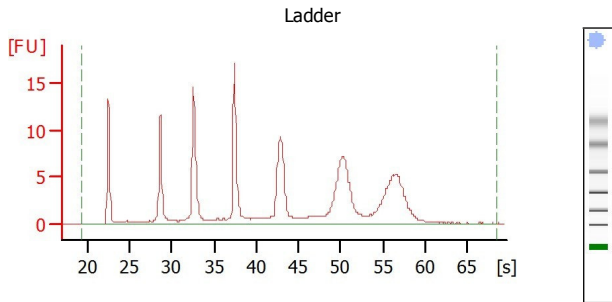

**Overall Results for sample 7 :** Ladder

RNA Area: 163.5  
 RNA Concentration: 150 ng/μl  
 Result Flagging Color:   
 Result Flagging Label: All Other Samples

**Fragment table for sample 7 :** Ladder

| Name | Start Time [s] | End Time [s] | Area  | % of total Area |
|------|----------------|--------------|-------|-----------------|
| 18S  | 41.06          | 42.31        | 140.5 | 26.4            |
| 28S  | 46.35          | 49.89        | 269.8 | 50.6            |

**Fig. S3. Qualitative and quantitative assessment of purified RNA from each individual groups GA-GE.**

### Supplementary Table (ST)

**Table ST3.** Quality assessment of RNA purification from the liver tissue sample having purity, yield and concentration.

| SL.No | Sample ID    | 260/280 | 260/230 | ng/ul | Yield (ng) | QC Purity | QC Conc./Yield |
|-------|--------------|---------|---------|-------|------------|-----------|----------------|
| 1     | GroupA (GA)  | 2.14    | 2.07    | 610.8 | 12216      | Optimal   | Optimal        |
| 2     | GroupB (GB)  | 2.08    | 1.23    | 564.4 | 11288      | Optimal   | Optimal        |
| 3     | GroupC (GC)  | 2.13    | 1.4     | 208.4 | 4168       | Optimal   | Optimal        |
| 4     | GroupD (GD)  | 2.13    | 0.85    | 334.6 | 6692       | Optimal   | Optimal        |
| 5     | Group E (GE) | 2.13    | 2.16    | 882.3 | 17646      | Optimal   | Optimal        |
